# Supplementary material for: Ribosomal MLST nucleotide identity (rMLST-NI), a rapid bacterial species identification method: application to Klebsiella and Raoultella genomic species validation
Source: PubMed Central journal article supplement (PMC9676034; doi:10.1099/mgen.0.000849), 2022-09-13
Supplement: mgen-8-849-s001.pdf [file mgen-8-849-s001.pdf]

## Assessment of species identification methods for the large-scale validation of *Klebsiella* and *Raoultella* species annotations in bacterial genome databases

### Supplementary Data

#### Tables and Figures

| Database ID | Isolate Name | NCBI GenBank assembly accession | Species in Publication         | Previous species annotation       | NCBI BioSample accession(s) | PubMed ID |
|-------------|--------------|---------------------------------|--------------------------------|-----------------------------------|-----------------------------|-----------|
| 8556        | SB5857       | GCA_900978845.1                 | <i>Klebsiella africana</i>     | <i>Klebsiella quasipneumoniae</i> | ERS2787533;<br>SAMEA4969318 | 30817987  |
| 8663        | SB3355       | GCA_901563825.1                 | <i>Klebsiella pasteurii</i>    | <i>Klebsiella grimontii</i>       | ERS3414262;<br>SAMEA5610071 | 31708881  |
| 8666        | SB3356       | GCA_901563875.1                 | <i>Klebsiella spallanzanii</i> | <i>Klebsiella michiganensis</i>   | ERS3414261;<br>SAMEA5610070 | 31708881  |
| 9187        | SB6413       | GCA_902158715.1                 | <i>Klebsiella pasteurii</i>    | <i>Klebsiella michiganensis</i>   | ERS3414268;<br>SAMEA5610077 | 31708881  |
| 9211        | SB6407       | GCA_902158585.1                 | <i>Klebsiella pasteurii</i>    | <i>Klebsiella grimontii</i>       | ERS3414263;<br>SAMEA5610072 | 31708881  |
| 9212        | SB6409       | GCA_902158575.1                 | <i>Klebsiella pasteurii</i>    | <i>Klebsiella grimontii</i>       | ERS3414267;<br>SAMEA5610076 | 31708881  |
| 9213        | SB6410       | GCA_902158545.1                 | <i>Klebsiella pasteurii</i>    | <i>Klebsiella grimontii</i>       | ERS3414264;<br>SAMEA5610073 | 31708881  |
| 9214        | SB6412       | GCA_902158725.1                 | <i>Klebsiella pasteurii</i>    | <i>Klebsiella grimontii</i>       | ERS3414265;<br>SAMEA5610074 | 31708881  |
| 9215        | SB6414       | GCA_902158655.1                 | <i>Klebsiella pasteurii</i>    | <i>Klebsiella grimontii</i>       | ERS3414269;<br>SAMEA5610078 | 31708881  |
| 9216        | SB6415       | GCA_902158635.1                 | <i>Klebsiella pasteurii</i>    | <i>Klebsiella grimontii</i>       | ERS3414270;<br>SAMEA5610079 | 31708881  |
| 9217        | SB6416       | GCA_902158665.1                 | <i>Klebsiella pasteurii</i>    | <i>Klebsiella grimontii</i>       | ERS3414271;<br>SAMEA5610080 | 31708881  |
| 9218        | SB6417       | GCA_902158695.1                 | <i>Klebsiella pasteurii</i>    | <i>Klebsiella grimontii</i>       | ERS3414272;<br>SAMEA5610081 | 31708881  |
| 9219        | SB6420       | GCA_902158645.1                 | <i>Klebsiella pasteurii</i>    | <i>Klebsiella grimontii</i>       | ERS3414273;<br>SAMEA5610082 | 31708881  |
| 9220        | SB6423       | GCA_902158705.1                 | <i>Klebsiella pasteurii</i>    | <i>Klebsiella grimontii</i>       | ERS3414274;<br>SAMEA5610083 | 31708881  |
| 9221        | SB6424       | GCA_902158685.1                 | <i>Klebsiella pasteurii</i>    | <i>Klebsiella grimontii</i>       | ERS3414266;<br>SAMEA5610075 | 31708881  |
| 9230        | SB6408       | GCA_902158595.1                 | <i>Klebsiella spallanzanii</i> | <i>Klebsiella michiganensis</i>   | ERS3414258;<br>SAMEA5610067 | 31708881  |
| 9231        | SB6411       | GCA_902158555.1                 | <i>Klebsiella spallanzanii</i> | <i>Klebsiella michiganensis</i>   | ERS3414259;<br>SAMEA5610068 | 31708881  |
| 9232        | SB6419       | GCA_902158565.1                 | <i>Klebsiella spallanzanii</i> | <i>Klebsiella michiganensis</i>   | ERS3414260;<br>SAMEA5610069 | 31708881  |

Supplementary Data Table 1: Species annotations for 18 genome records available at the NCBI Assembly database on 5<sup>th</sup> March 2021 were updated based on the information found in two publications (PMID:31708881, PMID:30817987) and communication with the publication authors (Carla Rodrigues, Institute Pasteur).

| Database ID | Isolate Name | Species                           | NCBI GenBank Assembly Accession | NCBI BioSample Accession | Country | Year of Isolation |
|-------------|--------------|-----------------------------------|---------------------------------|--------------------------|---------|-------------------|
| 23          | KCTC 2190    | <i>Klebsiella aerogenes</i>       | GCA_000215745.1                 | SAMN02603581             | n/a     | n/a               |
| 8556        | SB5857       | <i>Klebsiella africana</i>        | GCA_900978845.1                 | SAMEA4969318             | Senegal | 2016              |
| 2990        | 06D021       | <i>Klebsiella grimontii</i>       | GCA_900200035.1                 | SAMEA104188450           | France  | 1997              |
| 8579        | WCHKI090001  | <i>Klebsiella huaxiensis</i>      | GCA_003261575.2                 | SAMN08861555             | China   | 2017              |
| 9164        | TOUT106      | <i>Klebsiella indica</i>          | GCA_005860775.1                 | SAMN11776007             | India   | 2014              |
| 4277        | DSM 25444    | <i>Klebsiella michiganensis</i>   | GCA_002925905.1                 | SAMN07187491             | USA     | 2010              |
| 874         | NBRC 105695  | <i>Klebsiella oxytoca</i>         | GCA_001598695.1                 | SAMD00046899             | USA     | n/a               |
| 9214        | SB6412       | <i>Klebsiella pasteurii</i>       | GCA_902158725.1                 | SAMEA5610074             | Italy   | 2017              |
| 116         | DSM 30104    | <i>Klebsiella pneumoniae</i>      | GCA_000281755.1                 | SAMN02470063             | n/a     | n/a               |
| 1472        | 01A030       | <i>Klebsiella quasipneumoniae</i> | GCA_000751755.1                 | SAMEA2471851             | Austria | 1997              |
| 3288        | KPN1705      | <i>Klebsiella quasivariicola</i>  | GCA_002269255.1                 | SAMN06438648             | USA     | 2014              |
| 9231        | SB6411       | <i>Klebsiella spallanzanii</i>    | GCA_902158555.1                 | SAMEA5610068             | Italy   | 2017              |
| 331         | DSM 15968    | <i>Klebsiella variicola</i>       | GCA_000828055.2                 | SAMN01174581             | Mexico  | n/a               |
| 9178        | DSM 102253   | <i>Raoultella electrica</i>       | GCA_006711645.1                 | SAMN12125603             | Japan   | 2013              |
| 1486        | NBRC 105727  | <i>Raoultella ornithinolytica</i> | GCA_001598295.1                 | SAMD00046738             | Japan   | n/a               |
| 1489        | ATCC 33531   | <i>Raoultella planticola</i>      | GCA_000735435.1                 | SAMN02743268             | n/a     | n/a               |
| 8628        | NCTC13038    | <i>Raoultella terrigena</i>       | GCA_900706855.1                 | SAMEA2580322             | n/a     | n/a               |

Supplementary Data Table 2: 17 type strain isolates for the *Klebsiella/Raoultella* genera used in this study. The table contains the numeric database identifier in the Klebsiella project database (<https://pubmlst.org/projects/klebsiella>), the isolate name, species annotation, NCBI Assembly accession, NCBI BioSample accession, country of origin and year of isolation. n/a indicates where a country or year of isolation is not available.

| <b>rMLST Locus Identifier</b> | <b>Gene Name</b> | <b>Protein Product</b>       |
|-------------------------------|------------------|------------------------------|
| BACT000001                    | <i>rpsA</i>      | 30S ribosomal protein S1     |
| BACT000002                    | <i>rpsB</i>      | 30S ribosomal protein S2     |
| BACT000003                    | <i>rpsC</i>      | 30S ribosomal protein S3     |
| BACT000004                    | <i>rpsD</i>      | 30S ribosomal protein S4     |
| BACT000005                    | <i>rpsE</i>      | 30S ribosomal protein S5     |
| BACT000006                    | <i>rpsF</i>      | 30S ribosomal protein S6     |
| BACT000007                    | <i>rpsG</i>      | 30S ribosomal protein S7     |
| BACT000008                    | <i>rpsH</i>      | 30S ribosomal protein S8     |
| BACT000009                    | <i>rpsI</i>      | 30S ribosomal protein S9     |
| BACT000010                    | <i>rpsJ</i>      | 30S ribosomal protein S10    |
| BACT000011                    | <i>rpsK</i>      | 30S ribosomal protein S11    |
| BACT000012                    | <i>rpsL</i>      | 30S ribosomal protein S12    |
| BACT000013                    | <i>rpsM</i>      | 30S ribosomal protein S13    |
| BACT000014                    | <i>rpsN</i>      | 30S ribosomal protein S14    |
| BACT000015                    | <i>rpsO</i>      | 30S ribosomal protein S15    |
| BACT000016                    | <i>rpsP</i>      | 30S ribosomal protein S16    |
| BACT000017                    | <i>rpsQ</i>      | 30S ribosomal protein S17    |
| BACT000018                    | <i>rpsR</i>      | 30S ribosomal protein S18    |
| BACT000019                    | <i>rpsS</i>      | 30S ribosomal protein S19    |
| BACT000020                    | <i>rpsT</i>      | 30S ribosomal protein S20    |
| BACT000021                    | <i>rpsU</i>      | 30S ribosomal protein S21    |
| BACT000030                    | <i>rplA</i>      | 50S ribosomal protein L1     |
| BACT000031                    | <i>rplB</i>      | 50S ribosomal protein L2     |
| BACT000032                    | <i>rplC</i>      | 50S ribosomal protein L3     |
| BACT000033                    | <i>rplD</i>      | 50S ribosomal protein L4     |
| BACT000034                    | <i>rplE</i>      | 50S ribosomal protein L5     |
| BACT000035                    | <i>rplF</i>      | 50S ribosomal protein L6     |
| BACT000036                    | <i>rplL</i>      | 50S ribosomal protein L7/L12 |
| BACT000038                    | <i>rplI</i>      | 50S ribosomal protein L9     |
| BACT000039                    | <i>rplJ</i>      | 50S ribosomal protein L10    |
| BACT000040                    | <i>rplK</i>      | 50S ribosomal protein L11    |
| BACT000042                    | <i>rplM</i>      | 50S ribosomal protein L13    |
| BACT000043                    | <i>rplN</i>      | 50S ribosomal protein L14    |
| BACT000044                    | <i>rplO</i>      | 50S ribosomal protein L15    |
| BACT000045                    | <i>rplP</i>      | 50S ribosomal protein L16    |
| BACT000046                    | <i>rplQ</i>      | 50S ribosomal protein L17    |
| BACT000047                    | <i>rplR</i>      | 50S ribosomal protein L18    |
| BACT000048                    | <i>rplS</i>      | 50S ribosomal protein L19    |
| BACT000049                    | <i>rplT</i>      | 50S ribosomal protein L20    |
| BACT000050                    | <i>rplU</i>      | 50S ribosomal protein L21    |
| BACT000051                    | <i>rplV</i>      | 50S ribosomal protein L22    |
| BACT000052                    | <i>rplW</i>      | 50S ribosomal protein L23    |
| BACT000053                    | <i>rplX</i>      | 50S ribosomal protein L24    |
| BACT000056                    | <i>rpmA</i>      | 50S ribosomal protein L27    |
| BACT000057                    | <i>rpmB</i>      | 50S ribosomal protein L28    |
| BACT000058                    | <i>rpmC</i>      | 50S ribosomal protein L29    |
| BACT000059                    | <i>rpmD</i>      | 50S ribosomal protein L30    |
| BACT000060                    | <i>rpmE</i>      | 50S ribosomal protein L31    |
| BACT000061                    | <i>rpmF</i>      | 50S ribosomal protein L32    |
| BACT000062                    | <i>rpmG</i>      | 50S ribosomal protein L33    |
| BACT000063                    | <i>rpmH</i>      | 50S ribosomal protein L34    |
| BACT000064                    | <i>rpmI</i>      | 50S ribosomal protein L35    |
| BACT000065                    | <i>rpmJ</i>      | 50S ribosomal protein L36    |

Supplementary Data Table 3: Summary of the 53 loci defined by the ribosomal multilocus sequence typing (rMLST) scheme including the gene name and the protein product.

| Species                           | Number of genomes in comparison dataset per species (including type strain) | Range of ANI values (OrthoANIu) calculated for the green zone (%) | Highest observed ANI value (OrthoANIu) for a genomic match with a different species (%) | Range of ANI values (FastANI) calculated for the green zone (%) | Highest observed ANI value (FastANI) for a genomic match with a different species (%) |
|-----------------------------------|-----------------------------------------------------------------------------|-------------------------------------------------------------------|-----------------------------------------------------------------------------------------|-----------------------------------------------------------------|---------------------------------------------------------------------------------------|
| <i>Klebsiella aerogenes</i>       | 292                                                                         | 100 - 95.76                                                       | 85.67                                                                                   | 100 - 95.73                                                     | 86.72                                                                                 |
| <i>Klebsiella africana</i>        | 2                                                                           | 100 - 99.38                                                       | 95.55                                                                                   | 100 - 99.37                                                     | 95.53                                                                                 |
| <i>Klebsiella grimontii</i>       | 97                                                                          | 100 - 98.92                                                       | 96.12                                                                                   | 100 - 98.92                                                     | 96.10                                                                                 |
| <i>Klebsiella huaxiensis</i>      | 3                                                                           | 100 - 99.16                                                       | 91.59                                                                                   | 100 - 99.12                                                     | 92.21                                                                                 |
| <i>Klebsiella indica</i>          | 1                                                                           | 100 - 100                                                         | 87.03                                                                                   | 100 - 100                                                       | 86.55                                                                                 |
| <i>Klebsiella michiganensis</i>   | 224                                                                         | 100 - 97.48                                                       | 94.00                                                                                   | 100 - 97.37                                                     | 94.11                                                                                 |
| <i>Klebsiella oxytoca</i>         | 162                                                                         | 100 - 98.96                                                       | 92.51                                                                                   | 100 - 98.94                                                     | 92.63                                                                                 |
| <i>Klebsiella pasteurii</i>       | 13                                                                          | 100 - 99.25                                                       | 96.24                                                                                   | 100 - 99.21                                                     | 96.26                                                                                 |
| <i>Klebsiella pneumoniae</i>      | 9,766                                                                       | 100 - 97.93                                                       | 95.55                                                                                   | 100 - 97.91                                                     | 95.47                                                                                 |
| <i>Klebsiella quasipneumoniae</i> | 587                                                                         | 100 - 95.83                                                       | 95.06                                                                                   | 100 - 95.67                                                     | 95.00                                                                                 |
| <i>Klebsiella quasivariicola</i>  | 14                                                                          | 100 - 98.99                                                       | 95.26                                                                                   | 100 - 98.90                                                     | 95.33                                                                                 |
| <i>Klebsiella spallanzanii</i>    | 4                                                                           | 100 - 97.94                                                       | 91.48                                                                                   | 100 - 98.03                                                     | 92.13                                                                                 |
| <i>Klebsiella variicola</i>       | 431                                                                         | 100 - 96.96                                                       | 95.15                                                                                   | 100 - 96.87                                                     | 95.09                                                                                 |
| <i>Raoultella electrica</i>       | 1                                                                           | 100 - 100                                                         | 94.16                                                                                   | 100 - 100                                                       | 94.04                                                                                 |
| <i>Raoultella ornithinolytica</i> | 80                                                                          | 100 - 99.25                                                       | 96.13                                                                                   | 100 - 99.11                                                     | 96.00                                                                                 |
| <i>Raoultella planticola</i>      | 37                                                                          | 100 - 99.14                                                       | 96.11                                                                                   | 100 - 98.94                                                     | 95.94                                                                                 |
| <i>Raoultella terrigena</i>       | 36                                                                          | 100 - 96.85                                                       | 85.64                                                                                   | 100 - 96.64                                                     | 86.23                                                                                 |

Supplementary Data Table 4: Summary of observed Average Nucleotide Identity (ANI) values calculated by OrthoANIu and FastANI software for 11,750 genomic comparisons against each of the 17 *Klebsiella/Raoultella* type strain genomes (rounded to 2 decimal places). The green zone range of ANI values observed between genomic matches of the same species is typically between 100% and 96%. The highest observed ANI value for a genomic comparison with a different species is 96% or below.

| Species                           | Number of genomes in comparison dataset per species (including type strain) | Range of rMLST-NI values calculated for the green zone (%) | Highest observed rMLST-NI value for a genomic match with a different species (%) |
|-----------------------------------|-----------------------------------------------------------------------------|------------------------------------------------------------|----------------------------------------------------------------------------------|
| <i>Klebsiella aerogenes</i>       | 292                                                                         | 100 – 99.856                                               | 98.240                                                                           |
| <i>Klebsiella africana</i>        | 2                                                                           | 100 – 99.952                                               | 99.757                                                                           |
| <i>Klebsiella grimontii</i>       | 97                                                                          | 100 – 99.885                                               | 99.698                                                                           |
| <i>Klebsiella huaxiensis</i>      | 3                                                                           | 100 – 99.971                                               | 98.006                                                                           |
| <i>Klebsiella indica</i>          | 1                                                                           | 100 – 100.000                                              | 97.465                                                                           |
| <i>Klebsiella michiganensis</i>   | 224                                                                         | 100 – 99.823                                               | 99.640                                                                           |
| <i>Klebsiella oxytoca</i>         | 162                                                                         | 100 – 99.904                                               | 99.463                                                                           |
| <i>Klebsiella pasteurii</i>       | 13                                                                          | 100 – 99.947                                               | 99.703                                                                           |
| <i>Klebsiella pneumoniae</i>      | 9,766                                                                       | 100 – 99.780                                               | 99.727                                                                           |
| <i>Klebsiella quasipneumoniae</i> | 587                                                                         | 100 – 99.837                                               | 99.741                                                                           |
| <i>Klebsiella quasivariicola</i>  | 14                                                                          | 100 – 99.957                                               | 99.746                                                                           |
| <i>Klebsiella spallanzanii</i>    | 4                                                                           | 100 – 99.808                                               | 98.715                                                                           |
| <i>Klebsiella variicola</i>       | 431                                                                         | 100 – 99.631                                               | 99.216                                                                           |
| <i>Raoultella electrica</i>       | 1                                                                           | 100 – 100.000                                              | 99.573                                                                           |
| <i>Raoultella ornithinolytica</i> | 80                                                                          | 100 – 99.956                                               | 99.808                                                                           |
| <i>Raoultella planticola</i>      | 37                                                                          | 100 – 99.966                                               | 99.813                                                                           |
| <i>Raoultella terrigena</i>       | 36                                                                          | 100 – 99.593                                               | 98.260                                                                           |

Supplementary Data Table 5: Summary of observed rMLST nucleotide identity (rMLST-NI) values for 11,750 genomic comparisons against each of the 17 *Klebsiella*/*Raoultella* type strain genomes (rounded to 3 decimal places). The green zone range of rMLST-NI values observed between genomic matches of the same species is typically between 100% and 99.8%. The highest observed rMLST-NI value for a genomic comparison with a different species is 99.8% or below.

| <b>Number of CPU Cores</b> | <b>OrthoANIu</b>      | <b>FastANI</b> | <b>rMLST Nucleotide Identity (MLSS.pl)</b> | <b>Kleborate Species Scan (MASH)</b> |
|----------------------------|-----------------------|----------------|--------------------------------------------|--------------------------------------|
| 1                          | 84,651s (23h 30m 51s) | 235s (3m 55s)  | 52s (0m 52s)                               | 179s (2m 59s)                        |
| 10                         | 9,457s (2h 37m 37s)   | 45s (0m 45s)   | n/a                                        | n/a                                  |
| 20                         | 5,442s (1h 30m 42s)   | 31s (0m 31s)   | n/a                                        | n/a                                  |

Supplementary Data Table 6: Time taken to scan 17 type strain genomes against each library. The OrthoANIu and FastANI libraries contain 17 type strain genomes. The rMLST-NI library contains 618 rMLST allele DNA sequences and 17 rMLST profiles. The Kleborate k-mer sketch library contains 2,620 entries. OrthoANIu and FastANI can be configured to run on multiple CPU cores, whilst the rMLST-NI method (using MLSS.pl) and Kleborate species scan run on one CPU core.

| Isolate Id | Isolate Name       | NCBI Assembly Identifier (Genbank) | Species of Best OrthoANIu Match (Average Nucleotide Identity) | Species in Source Database (Average Nucleotide Identity) |
|------------|--------------------|------------------------------------|---------------------------------------------------------------|----------------------------------------------------------|
| 7586       | NCTC9644           | GCA_900636315.1                    | <i>K. pneumoniae</i> (99.1%)                                  | <i>K. aerogenes</i> (84.9%)                              |
| 8778       | 4928STDY7071692    | GCA_902163325.1                    | <i>K. pasteurii</i> (99.4%)                                   | <i>K. grimontii</i> (96.0%)                              |
| 8779       | 4928STDY7071693    | GCA_902163335.1                    | <i>K. pasteurii</i> (99.5%)                                   | <i>K. grimontii</i> (95.9%)                              |
| 8780       | 4928STDY7071694    | GCA_902163315.1                    | <i>K. pasteurii</i> (99.4%)                                   | <i>K. grimontii</i> (96.1%)                              |
| 8781       | 4928STDY7071695    | GCA_902163345.1                    | <i>K. pasteurii</i> (99.5%)                                   | <i>K. grimontii</i> (96.0%)                              |
| 8816       | SPARK1531C2        | GCA_902158675.1                    | <i>K. pasteurii</i> (99.3%)                                   | <i>K. grimontii</i> (96.2%)                              |
| 11537      | 1001295B_180824_F3 | GCA_015550565.1                    | <i>K. pasteurii</i> (99.4%)                                   | <i>K. grimontii</i> (95.9%)                              |
| 52         | SA2                | GCA_000427015.1                    | <i>K. grimontii</i> (99.4%)                                   | <i>K. michiganensis</i> (93.8%)                          |
| 337        | 1169_SBOY          | GCA_001060405.1                    | <i>K. grimontii</i> (99.2%)                                   | <i>K. michiganensis</i> (93.8%)                          |
| 412        | 1037_KOXY          | GCA_001053665.1                    | <i>K. grimontii</i> (99.2%)                                   | <i>K. michiganensis</i> (93.8%)                          |
| 421        | 1154_KOXY          | GCA_001052825.1                    | <i>K. grimontii</i> (99.2%)                                   | <i>K. michiganensis</i> (93.7%)                          |
| 431        | 371_KOXY           | GCA_001054995.1                    | <i>K. grimontii</i> (99.3%)                                   | <i>K. michiganensis</i> (93.8%)                          |
| 432        | 375_KOXY           | GCA_001070955.1                    | <i>K. grimontii</i> (99.3%)                                   | <i>K. michiganensis</i> (93.9%)                          |
| 433        | 397_KOXY           | GCA_001072735.1                    | <i>K. grimontii</i> (99.3%)                                   | <i>K. michiganensis</i> (93.8%)                          |
| 434        | 409_KOXY           | GCA_001072835.1                    | <i>K. grimontii</i> (99.2%)                                   | <i>K. michiganensis</i> (93.8%)                          |
| 441        | 636_KOXY           | GCA_001065765.1                    | <i>K. grimontii</i> (98.9%)                                   | <i>K. michiganensis</i> (93.8%)                          |
| 442        | 649_KOXY           | GCA_001066775.1                    | <i>K. grimontii</i> (99.4%)                                   | <i>K. michiganensis</i> (93.8%)                          |
| 775        | 452_SSON           | GCA_001076805.1                    | <i>K. grimontii</i> (99.2%)                                   | <i>K. michiganensis</i> (93.8%)                          |
| 819        | M5al               | GCA_001633115.1                    | <i>K. grimontii</i> (99.5%)                                   | <i>K. michiganensis</i> (93.8%)                          |
| 820        | SA2                | GCA_000733495.1                    | <i>K. grimontii</i> (99.4%)                                   | <i>K. michiganensis</i> (93.7%)                          |
| 3400       | D14                | GCA_002856195.1                    | <i>K. grimontii</i> (99.2%)                                   | <i>K. michiganensis</i> (93.7%)                          |
| 9226       | MGYG-HGUT-00093    | GCA_902363155.1                    | <i>K. grimontii</i> (99.3%)                                   | <i>K. michiganensis</i> (93.7%)                          |
| 47         | 10-5250            | GCA_000247915.1                    | <i>K. pasteurii</i> (99.4%)                                   | <i>K. michiganensis</i> (93.9%)                          |
| 438        | 625_KOXY           | GCA_001057685.1                    | <i>K. pasteurii</i> (99.5%)                                   | <i>K. michiganensis</i> (93.9%)                          |
| 439        | 628_KOXY           | GCA_001065705.1                    | <i>K. pasteurii</i> (99.5%)                                   | <i>K. michiganensis</i> (93.9%)                          |
| 1847       | PO2731             | GCA_002186735.1                    | <i>K. pasteurii</i> (99.4%)                                   | <i>K. michiganensis</i> (93.8%)                          |
| 9843       | ARO112             | GCA_009757395.1                    | <i>K. pasteurii</i> (99.5%)                                   | <i>K. michiganensis</i> (93.7%)                          |
| 10756      | CRN 17             | GCA_013266985.1                    | <i>K. pasteurii</i> (99.5%)                                   | <i>K. michiganensis</i> (93.9%)                          |
| 11908      | 132656-17          | GCA_015679345.1                    | <i>K. pasteurii</i> (99.6%)                                   | <i>K. michiganensis</i> (94.0%)                          |
| 11925      | KLO00002           | GCA_015721765.1                    | <i>K. pasteurii</i> (99.1%)                                   | <i>K. michiganensis</i> (93.9%)                          |
| 12257      | B106               | GCA_016616645.1                    | <i>K. pasteurii</i> (99.4%)                                   | <i>K. michiganensis</i> (93.9%)                          |
| 12261      | KA98_C             | GCA_016652955.1                    | <i>K. pasteurii</i> (99.5%)                                   | <i>K. michiganensis</i> (93.8%)                          |
| 420        | 1148_KOXY          | GCA_001052235.1                    | <i>K. grimontii</i> (99.2%)                                   | <i>K. oxytoca</i> (91.4%)                                |
| 1723       | JKo3               | GCA_001548355.1                    | <i>K. grimontii</i> (99.2%)                                   | <i>K. oxytoca</i> (91.4%)                                |
| 1852       | DSM 29614          | GCA_002080105.1                    | <i>K. grimontii</i> (99.2%)                                   | <i>K. oxytoca</i> (91.5%)                                |
| 4285       | NK-1               | GCA_003339485.1                    | <i>K. grimontii</i> (99.3%)                                   | <i>K. oxytoca</i> (91.4%)                                |
| 4976       | SN1015-66          | GCA_003416995.1                    | <i>K. grimontii</i> (99.1%)                                   | <i>K. oxytoca</i> (91.4%)                                |
| 4977       | H6                 | GCA_003417005.1                    | <i>K. grimontii</i> (99.2%)                                   | <i>K. oxytoca</i> (91.4%)                                |
| 8734       | 4928STDY7071416    | GCA_902160405.1                    | <i>K. grimontii</i> (99.2%)                                   | <i>K. oxytoca</i> (91.5%)                                |
| 8735       | 4928STDY7071417    | GCA_902160375.1                    | <i>K. grimontii</i> (99.2%)                                   | <i>K. oxytoca</i> (91.5%)                                |
| 11258      | RHBSTW-00432       | GCA_013737895.1                    | <i>K. grimontii</i> (99.4%)                                   | <i>K. oxytoca</i> (91.5%)                                |
| 11259      | RHBSTW-00452       | GCA_013737205.1                    | <i>K. grimontii</i> (99.1%)                                   | <i>K. oxytoca</i> (91.5%)                                |
| 11261      | RHBSTW-00651       | GCA_013733775.1                    | <i>K. grimontii</i> (99.1%)                                   | <i>K. oxytoca</i> (91.5%)                                |
| 4284       | 67                 | GCA_003201885.1                    | <i>K. huaxiensis</i> (95.3%)                                  | <i>K. oxytoca</i> (87.2%)                                |
| 1722       | CAV1374            | GCA_001022195.1                    | <i>K. michiganensis</i> (98.9%)                               | <i>K. oxytoca</i> (92.3%)                                |
| 1724       | KONIH1             | GCA_000714655.1                    | <i>K. michiganensis</i> (98.5%)                               | <i>K. oxytoca</i> (92.3%)                                |
| 1851       | TDB-1              | GCA_002111445.1                    | <i>K. michiganensis</i> (98.8%)                               | <i>K. oxytoca</i> (92.2%)                                |
| 3188       | CAV1752            | GCA_001970835.1                    | <i>K. michiganensis</i> (98.7%)                               | <i>K. oxytoca</i> (92.3%)                                |
| 3189       | AR_0147            | GCA_002072655.1                    | <i>K. michiganensis</i> (98.8%)                               | <i>K. oxytoca</i> (92.4%)                                |
| 3407       | AR_0028            | GCA_002947505.1                    | <i>K. michiganensis</i> (98.7%)                               | <i>K. oxytoca</i> (92.3%)                                |
| 3408       | KONIH2             | GCA_002906415.1                    | <i>K. michiganensis</i> (98.8%)                               | <i>K. oxytoca</i> (92.3%)                                |

|       |                     |                 |                                   |                                   |
|-------|---------------------|-----------------|-----------------------------------|-----------------------------------|
| 3409  | KONIH4              | GCA_002906395.1 | <i>K. michiganensis</i> (98.5%)   | <i>K. oxytoca</i> (92.3%)         |
| 3410  | KONIH5              | GCA_002906435.1 | <i>K. michiganensis</i> (98.5%)   | <i>K. oxytoca</i> (92.3%)         |
| 4278  | KONIH8              | GCA_002918635.1 | <i>K. michiganensis</i> (98.5%)   | <i>K. oxytoca</i> (92.3%)         |
| 4279  | KONIH3              | GCA_002918655.1 | <i>K. michiganensis</i> (98.5%)   | <i>K. oxytoca</i> (92.3%)         |
| 4281  | KONIH6              | GCA_002918695.1 | <i>K. michiganensis</i> (98.5%)   | <i>K. oxytoca</i> (92.4%)         |
| 4282  | KONIH7              | GCA_002919605.1 | <i>K. michiganensis</i> (98.5%)   | <i>K. oxytoca</i> (92.3%)         |
| 4283  | KONIH9              | GCA_002919625.1 | <i>K. michiganensis</i> (98.5%)   | <i>K. oxytoca</i> (92.3%)         |
| 11046 | RHBSTW-00493        | GCA_013784845.1 | <i>K. michiganensis</i> (99.1%)   | <i>K. oxytoca</i> (92.4%)         |
| 11256 | RHBSTW-00365        | GCA_013751295.1 | <i>K. michiganensis</i> (98.9%)   | <i>K. oxytoca</i> (92.3%)         |
| 11260 | RHBSTW-00529        | GCA_013747515.1 | <i>K. michiganensis</i> (99.1%)   | <i>K. oxytoca</i> (92.3%)         |
| 4317  | TUM1814             | GCA_003176335.1 | <i>K. quasipneumoniae</i> (96.6%) | <i>K. pneumoniae</i> (93.8%)      |
| 4731  | 4300STDY6636983     | GCA_900493045.1 | <i>K. quasipneumoniae</i> (96.5%) | <i>K. pneumoniae</i> (93.9%)      |
| 6959  | KPN1344             | GCA_003815095.1 | <i>K. quasipneumoniae</i> (99.1%) | <i>K. pneumoniae</i> (93.6%)      |
| 7018  | NIT-KP              | GCA_003711965.1 | <i>K. quasipneumoniae</i> (96.6%) | <i>K. pneumoniae</i> (93.9%)      |
| 7742  | GEO_33_Down_A       | GCA_004024245.1 | <i>K. quasipneumoniae</i> (96.6%) | <i>K. pneumoniae</i> (93.8%)      |
| 7743  | GEO_28_Up_A         | GCA_004024275.1 | <i>K. quasipneumoniae</i> (96.5%) | <i>K. pneumoniae</i> (93.7%)      |
| 11107 | KAM260              | GCA_013426775.1 | <i>K. quasipneumoniae</i> (96.6%) | <i>K. pneumoniae</i> (93.7%)      |
| 11680 | INF291-sc-2280225   | GCA_904864575.1 | <i>K. quasipneumoniae</i> (96.7%) | <i>K. pneumoniae</i> (93.9%)      |
| 1784  | YH43                | GCA_001548315.1 | <i>K. variicola</i> (97.0%)       | <i>K. pneumoniae</i> (94.2%)      |
| 4313  | TUM1382             | GCA_003175595.1 | <i>K. variicola</i> (99.0%)       | <i>K. pneumoniae</i> (94.4%)      |
| 11640 | INF022-sc-2279895   | GCA_904863055.1 | <i>K. variicola</i> (97.8%)       | <i>K. pneumoniae</i> (96.0%)      |
| 11644 | INF058-sc-2279968   | GCA_904863155.1 | <i>K. variicola</i> (99.0%)       | <i>K. pneumoniae</i> (94.7%)      |
| 11656 | INF154-sc-2279998   | GCA_904866265.1 | <i>K. variicola</i> (98.6%)       | <i>K. pneumoniae</i> (95.0%)      |
| 11667 | INF208-sc-2280076   | GCA_904864495.1 | <i>K. variicola</i> (98.6%)       | <i>K. pneumoniae</i> (95.0%)      |
| 11671 | INF232-sc-2280123   | GCA_904866545.1 | <i>K. variicola</i> (98.7%)       | <i>K. pneumoniae</i> (94.9%)      |
| 11679 | INF290-sc-2280223   | GCA_904865775.1 | <i>K. variicola</i> (98.6%)       | <i>K. pneumoniae</i> (95.0%)      |
| 11695 | INF336-sc-2280147   | GCA_904866525.1 | <i>K. variicola</i> (98.7%)       | <i>K. pneumoniae</i> (95.1%)      |
| 11698 | INF345-sc-2280164   | GCA_904864455.1 | <i>K. variicola</i> (99.1%)       | <i>K. pneumoniae</i> (94.5%)      |
| 11749 | KSB1_10B-sc-2280232 | GCA_904866515.1 | <i>K. variicola</i> (99.2%)       | <i>K. pneumoniae</i> (94.5%)      |
| 11759 | KSB1_8D-sc-2280250  | GCA_904863415.1 | <i>K. variicola</i> (98.6%)       | <i>K. pneumoniae</i> (95.0%)      |
| 11760 | KSB1_8J-sc-2280307  | GCA_904866185.1 | <i>K. variicola</i> (99.1%)       | <i>K. pneumoniae</i> (94.5%)      |
| 11761 | KSB1_9F-sc-2280270  | GCA_904865705.1 | <i>K. variicola</i> (99.0%)       | <i>K. pneumoniae</i> (94.5%)      |
| 11767 | KSB2_3A-sc-2280319  | GCA_904863065.1 | <i>K. variicola</i> (99.1%)       | <i>K. pneumoniae</i> (94.5%)      |
| 8616  | TUM14061            | GCA_004312065.1 | <i>R. electrica</i> (99.1%)       | <i>R. ornithinolytica</i> (93.9%) |
| 12242 | LL1                 | GCA_014764465.1 | <i>R. electrica</i> (98.8%)       | <i>R. ornithinolytica</i> (94.1%) |
| 1789  | S12                 | GCA_000829965.1 | <i>R. terrigena</i> (99.1%)       | <i>R. ornithinolytica</i> (85.4%) |
| 8614  | JUb54               | GCA_004341525.1 | <i>R. terrigena</i> (97.3%)       | <i>R. ornithinolytica</i> (85.3%) |
| 11849 | STW0522-56          | GCA_015135635.1 | <i>R. electrica</i> (99.0%)       | <i>R. planticola</i> (93.5%)      |

Supplementary Data Table 7: Summary of OrthoANlu results for 89 NCBI Assembly entries where the source database species annotation does not correspond with the closest *Klebsiella/Raoultella* type strain using ANI as the genomic comparison metric. The ANI value for the closest type strain species and the source database species are included.



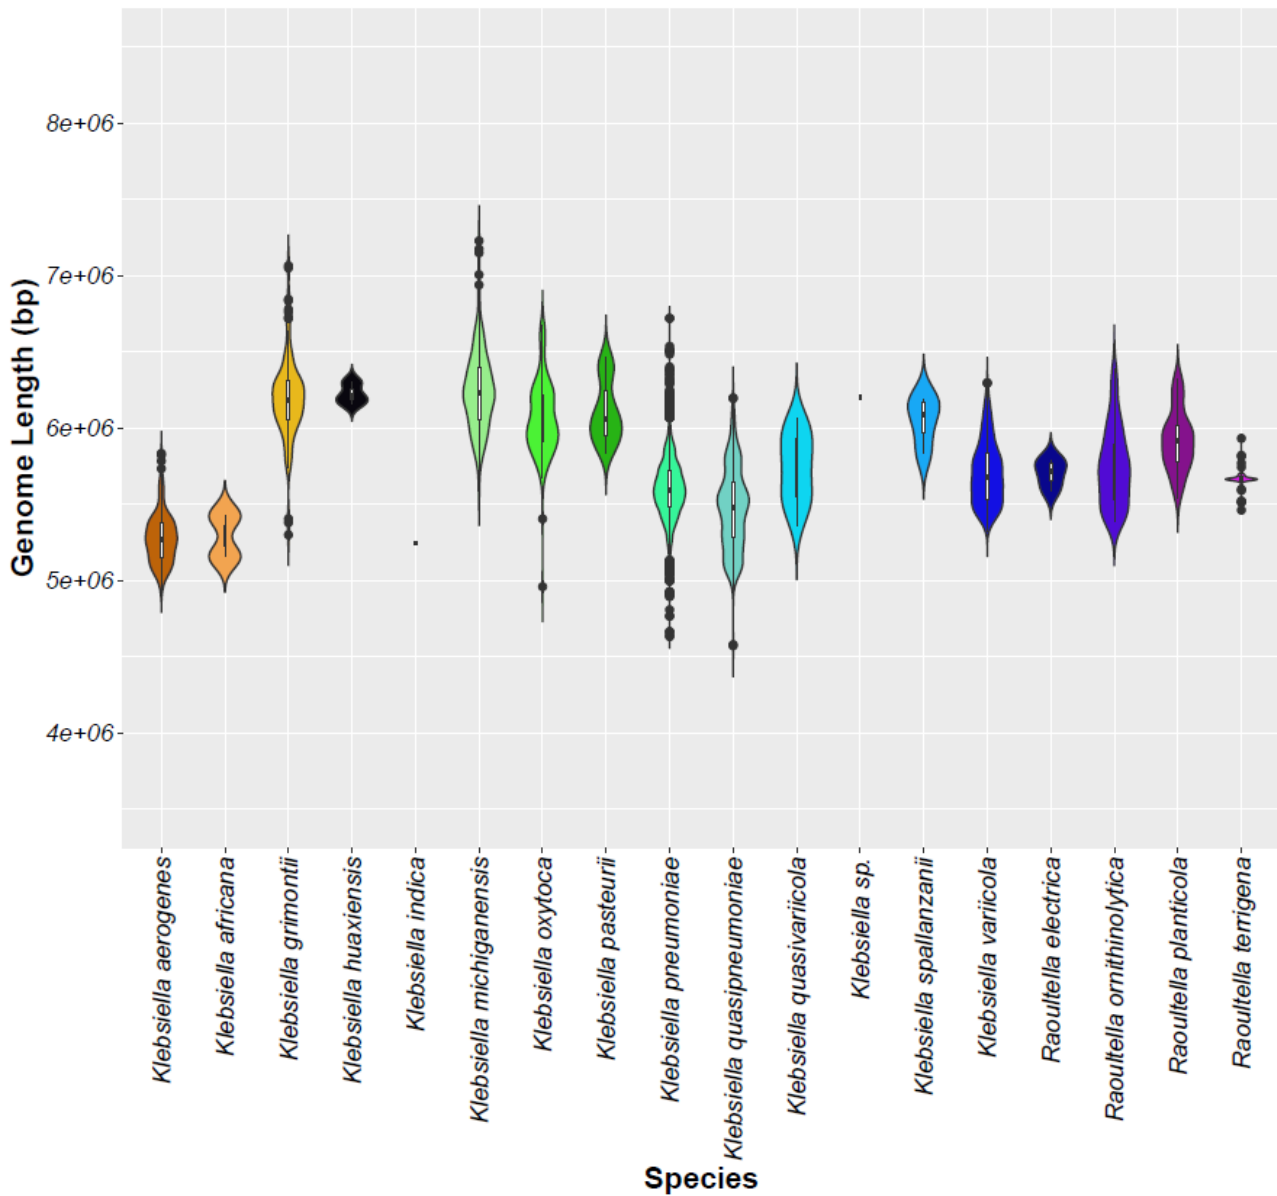

Supplementary Data Figure 1: Graph of genome size ranges of 17 *Klebsiella*/*Raoultella* species across a dataset of 11,791 genomes. Forty-eight genomes with suspected DNA contamination identified by rMLST allelic matches to non-*Klebsiella*/*Raoultella* species were excluded from the dataset. The violin plot representation indicates the variation of the genome size within each species.

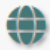

### Provenance/meta data

**locus:** BACT000035 (rplF)

**allele:** 2393

**sequence:** ATGTCTCGTG TTGCTAAAGC ACCGGTCGTT GTTCCTGCCG GCGTTGACGT TAAAGTCAAC GGCAGGTTA  
TTACGATCAA AGGTAAAAAT GCGGAGCTGA CTCGTACTCT CAACGATGCT GTTGAAGTTA AACATGCAGA  
TAATGCTCTG ACCTTCGGTC CGCGTGATGG TTACGTAGAC GGATGGGCTC AGGCTGGTAC CGCGCGTGCC  
CTGCTGAACT CAATGGTTAT CGGTGTTACC GAAGGCTTCA CTAAAAAGCT TCAGCTGGTT GGTGTAGGCT  
ATCGTGCAGC GGTAAAAGGG GATGTAGTAA ACCTGGCTTT AGGTTTCTCT CATCCTGTTG AACATAAGCT  
GCCGGCCGGT ATCACTGCAG AATGCCCGAC TCAAAGTAA ATCGTGTGA AAGGCGCTGA TAAGCAGGTG  
ATCGGTCAGG TTGCAGCAGA TCTGCGCGCC TACCGTCGTC CTGAGCCTTA CAAAGGCAAG GGTGTTGTT  
ACGCCGACGA AGTCGTGCGT ACCAAAGAGG CTAAGAAGAA GTAA

**length:** 534

**status:** WGS: automated extract (BIGSdb)

**date entered:** 2014-01-03

**datestamp:** 2014-01-03

**sender:** James Bray

**curator:** James Bray, University of Oxford, UK

Supplementary Data Figure 2: An example allelic entry of the BACT000035/rplF gene from the rMLST sequence definition database hosted on the PubMLST website (<https://pubmlst.org/species-id>). This rMLST allele is number 2393 and is 534 base pairs in length. This allele is found in some *Klebsiella aerogenes* isolates.

Schemes and loci hide tree

- All loci
  - Typing
  - Other schemes

| Typing                              |                                     |                                     |                                     |             |             |             |
|-------------------------------------|-------------------------------------|-------------------------------------|-------------------------------------|-------------|-------------|-------------|
| Ribosomal MLST                      |                                     |                                     |                                     |             |             |             |
| BACT000001 (rpsA) <a href="#">i</a> | BACT000002 (rpsB) <a href="#">i</a> | BACT000003 (rpsC) <a href="#">i</a> | BACT000004 (rpsD) <a href="#">i</a> |             |             |             |
| 3916 <a href="#">s</a>              | 2949 <a href="#">s</a>              | 2480 <a href="#">s</a>              | 2556 <a href="#">s</a>              |             |             |             |
| BACT000005 (rpsE) <a href="#">i</a> | BACT000006 (rpsF) <a href="#">i</a> | BACT000007 (rpsG) <a href="#">i</a> | BACT000008 (rpsH) <a href="#">i</a> |             |             |             |
| 2347 <a href="#">s</a>              | 1958 <a href="#">s</a>              | 2248 <a href="#">s</a>              | 2101 <a href="#">s</a>              |             |             |             |
| BACT000009 (rpsI) <a href="#">i</a> | BACT000010 (rpsJ) <a href="#">i</a> | BACT000011 (rpsK) <a href="#">i</a> | BACT000012 (rpsL) <a href="#">i</a> |             |             |             |
| 2364 <a href="#">s</a>              | 2037 <a href="#">s</a>              | 1979 <a href="#">s</a>              | 2191 <a href="#">s</a>              |             |             |             |
| BACT000013 (rpsM) <a href="#">i</a> | BACT000014 (rpsN) <a href="#">i</a> | BACT000015 (rpsO) <a href="#">i</a> | BACT000016 (rpsP) <a href="#">i</a> |             |             |             |
| 2002 <a href="#">s</a>              | 1712 <a href="#">s</a>              | 2049 <a href="#">s</a>              | 1620 <a href="#">s</a>              |             |             |             |
| BACT000017 (rpsQ) <a href="#">i</a> | BACT000018 (rpsR) <a href="#">i</a> | BACT000019 (rpsS) <a href="#">i</a> | BACT000020 (rpsT) <a href="#">i</a> |             |             |             |
| 1874 <a href="#">s</a>              | 1810 <a href="#">s</a>              | 33 <a href="#">s</a>                | 1925 <a href="#">s</a>              |             |             |             |
| BACT000021 (rpsU) <a href="#">i</a> | BACT000030 (rplA) <a href="#">i</a> | BACT000031 (rplB) <a href="#">i</a> | BACT000032 (rplC) <a href="#">i</a> |             |             |             |
| 15 <a href="#">s</a>                | 2959 <a href="#">s</a>              | 2885 <a href="#">s</a>              | 1526 <a href="#">s</a>              |             |             |             |
| BACT000033 (rplD) <a href="#">i</a> | BACT000034 (rplE) <a href="#">i</a> | BACT000035 (rplF) <a href="#">i</a> | BACT000036 (rplL) <a href="#">i</a> |             |             |             |
| 2681 <a href="#">s</a>              | 2258 <a href="#">s</a>              | 2393 <a href="#">s</a>              | 2255 <a href="#">s</a>              |             |             |             |
| BACT000038 (rplI) <a href="#">i</a> | BACT000039 (rplJ) <a href="#">i</a> | BACT000040 (rplK) <a href="#">i</a> | BACT000042 (rplM) <a href="#">i</a> |             |             |             |
| 2608 <a href="#">s</a>              | 2176 <a href="#">s</a>              | 2334 <a href="#">s</a>              | 2282 <a href="#">s</a>              |             |             |             |
| BACT000043 (rplN) <a href="#">i</a> | BACT000044 (rplO) <a href="#">i</a> | BACT000045 (rplP) <a href="#">i</a> | BACT000046 (rplQ) <a href="#">i</a> |             |             |             |
| 1634 <a href="#">s</a>              | 2306 <a href="#">s</a>              | 2034 <a href="#">s</a>              | 2075 <a href="#">s</a>              |             |             |             |
| BACT000047 (rplR) <a href="#">i</a> | BACT000048 (rplS) <a href="#">i</a> | BACT000049 (rplT) <a href="#">i</a> | BACT000050 (rplU) <a href="#">i</a> |             |             |             |
| 48 <a href="#">s</a>                | 2241 <a href="#">s</a>              | 2239 <a href="#">s</a>              | 2039 <a href="#">s</a>              |             |             |             |
| BACT000051 (rplV) <a href="#">i</a> | BACT000052 (rplW) <a href="#">i</a> | BACT000053 (rplX) <a href="#">i</a> | BACT000056 (rpmA) <a href="#">i</a> |             |             |             |
| 48 <a href="#">s</a>                | 1899 <a href="#">s</a>              | 1970 <a href="#">s</a>              | 1993 <a href="#">s</a>              |             |             |             |
| BACT000057 (rpmB) <a href="#">i</a> | BACT000058 (rpmC) <a href="#">i</a> | BACT000059 (rpmD) <a href="#">i</a> | BACT000060 (rpmE) <a href="#">i</a> |             |             |             |
| 1706 <a href="#">s</a>              | 32 <a href="#">s</a>                | 1376 <a href="#">s</a>              | 1941, 16542 <a href="#">s</a>       |             |             |             |
| BACT000061 (rpmF) <a href="#">i</a> | BACT000062 (rpmG) <a href="#">i</a> | BACT000063 (rpmH) <a href="#">i</a> | BACT000064 (rpmI) <a href="#">i</a> |             |             |             |
| 1711 <a href="#">s</a>              | 1699 <a href="#">s</a>              | 1548 <a href="#">s</a>              | 1446 <a href="#">s</a>              |             |             |             |
| BACT000065 (rpmJ) <a href="#">i</a> | rST                                 | genus                               | species                             | subspecies  | lineage     | sublineage  |
| 1035, 11662 <a href="#">s</a>       | 44287                               | Klebsiella                          | Klebsiella aerogenes                | Not defined | Not defined | Not defined |
| other designation                   | notes                               |                                     |                                     |             |             |             |
| Not defined                         | Not defined                         |                                     |                                     |             |             |             |

Supplementary Data Figure 3: rMLST allele designations for all 53 rMLST loci of the *Klebsiella aerogenes* type strain isolate KCTC 2190 (*Klebsiella* project database isolate id 23).

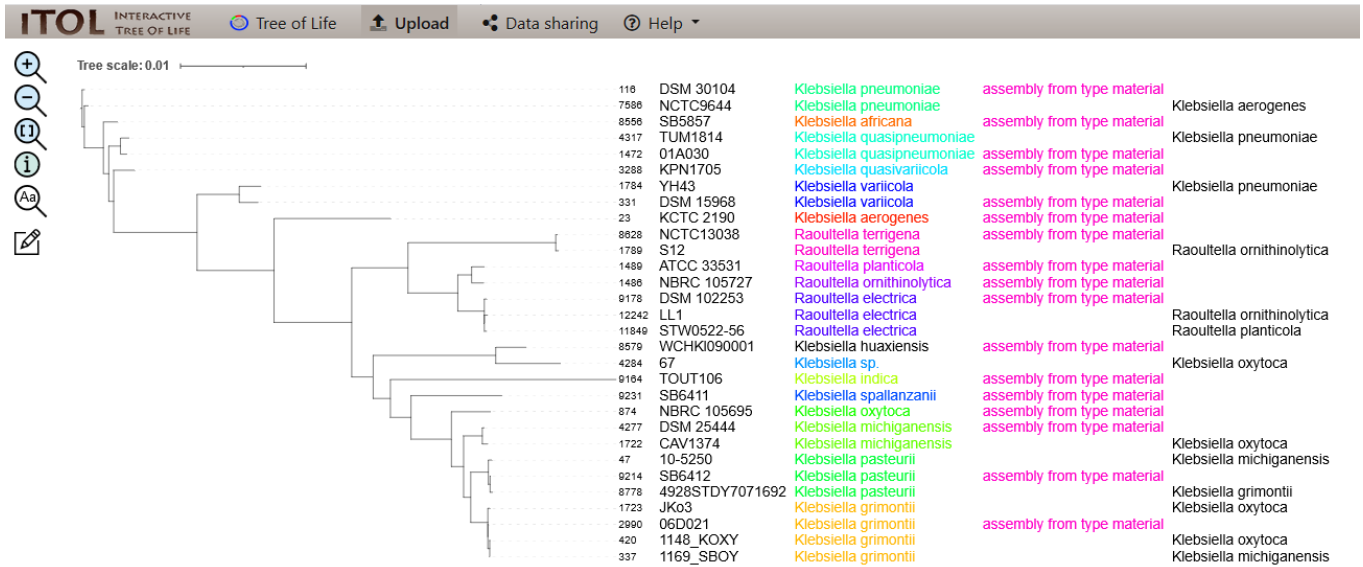

Supplementary Data Figure 4: Interactive Tree of Life (iTOL, <https://itol.embl.de>) visualisation of a phylogenetic tree of 30 *Klebsiella/Raoultella* isolates including 17 type strains and 13 non-type strain isolates where the NCBI Assembly species annotation was not consistent with the automated species identification scan results. The neighbour-joining tree was calculated by CLUSTAL W (v2.1) from the concatenated alleles of non-paralogous rMLST loci. Each isolate is annotated with (1) database identifier, (2) isolate name (3) species (type strain and predicted species), (4) 'assembly from type material' if isolate is a type strain (5) species in source database (if different). This tree was constructed in 12 seconds on the *Klebsiella* project database from existing rMLST allele designations and DNA sequences stored in the rMLST sequence definition database.

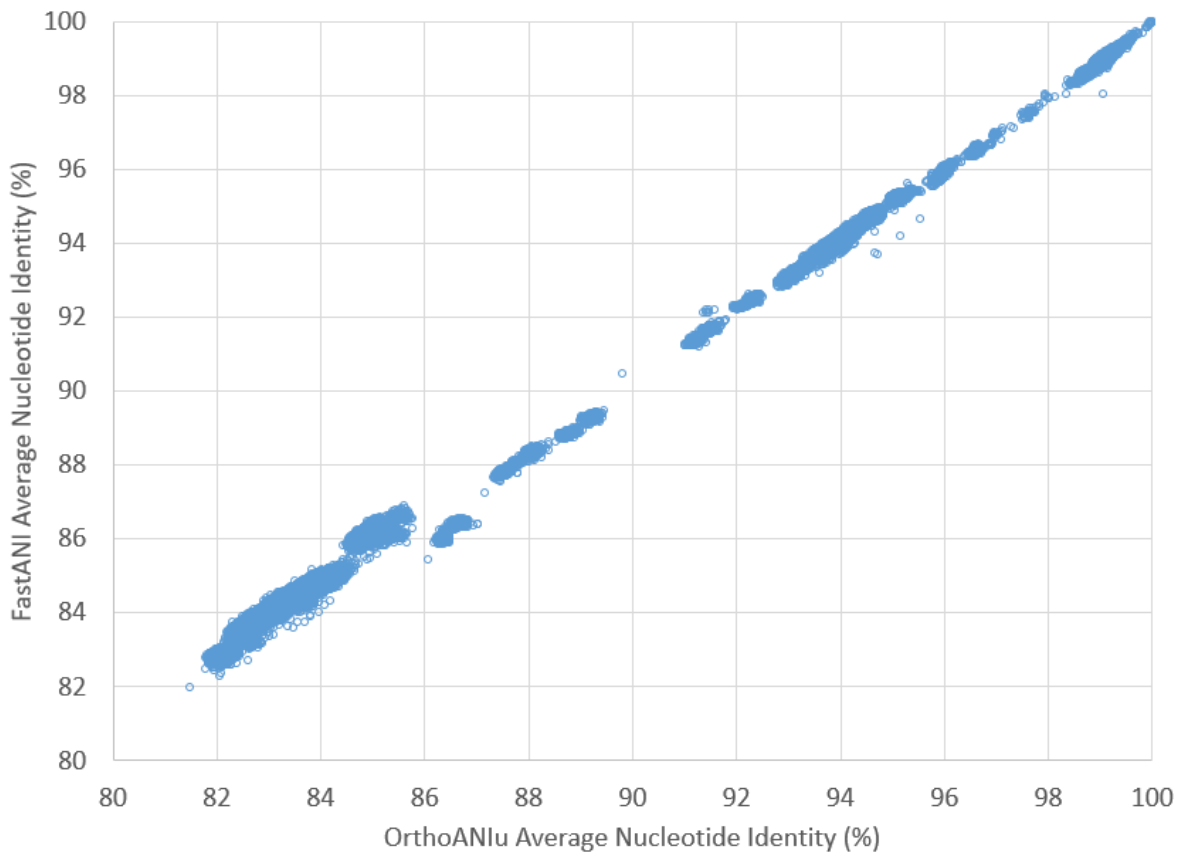

Supplementary Data Figure 5: Comparison of OrthoANLu average nucleotide identity (ANI) values with FastANI ANI values for 11,839 genomes against the library of 17 *Klebsiella/Raoultella* type strain genomes (201,263 pairwise comparisons for each algorithm). The  $R^2$  value is 0.999.
